# Supplementary material for: α-Fe2O3 with novel double hexagonal pyramid morphology synthesized using a dual-ion co-work system as an anode for lithium-ion batteries
Source: Royal Society of Chemistry journal article supplement (doi:10.1039/c9ce00618d), 2019-01-01
Supplement: c9ce00618d2.pdf [file c9ce00618d2.pdf]

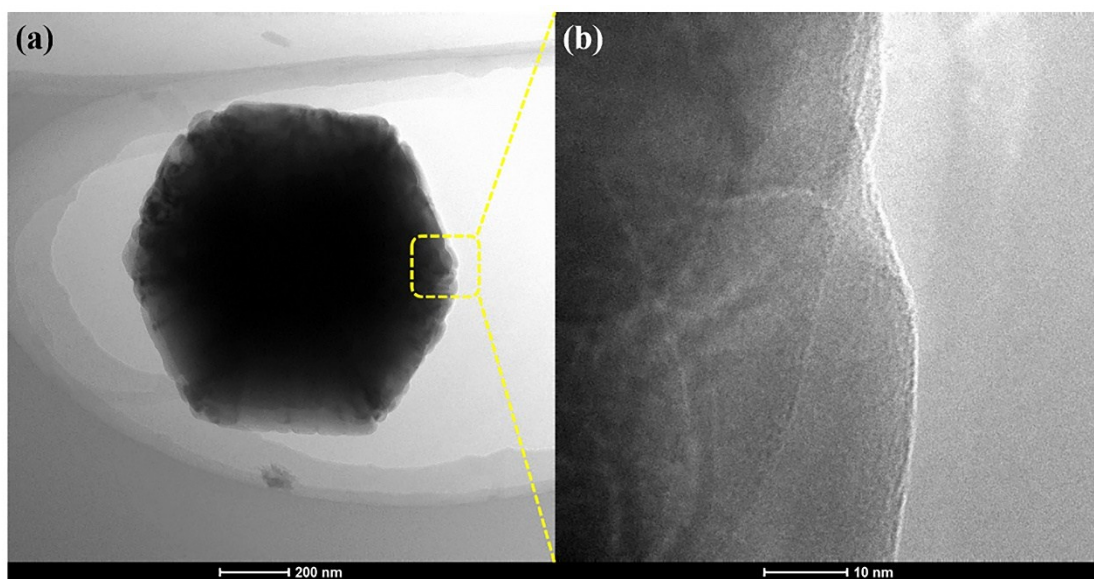

**Figure. S1** (a) TEM images of the  $\alpha$ - $\text{Fe}_2\text{O}_3$  particles and (b) the high resolution TEM image of the edge of the sample.

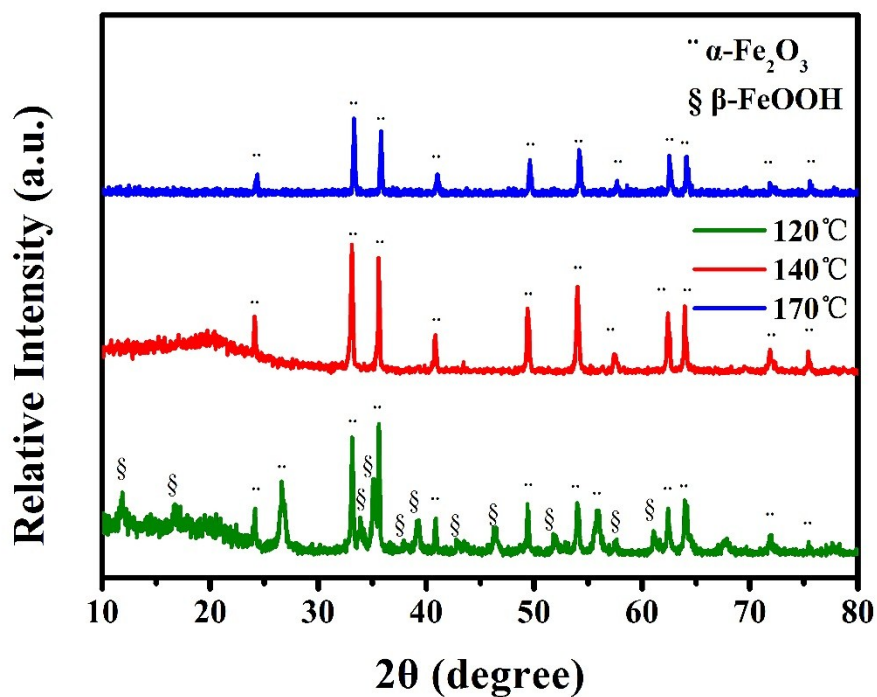

Figure. S2 XRD patterns of the products prepared in different temperature

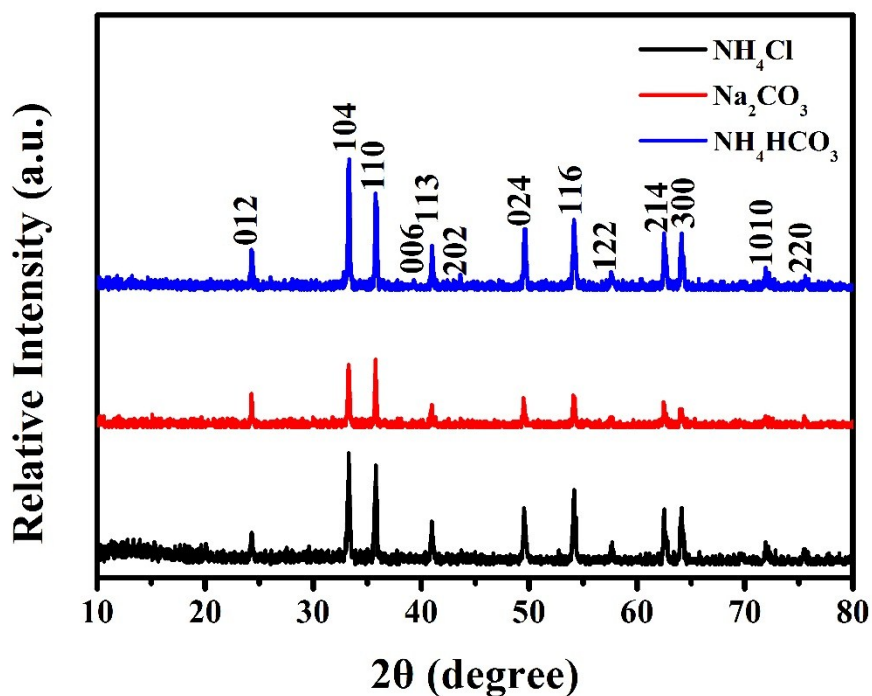

Figure. S3 XRD patterns of the products synthesized by  $\text{NH}_4\text{Cl}$ ,  $\text{Na}_2\text{CO}_3$  and  $\text{NH}_4\text{HCO}_3$  respectively.

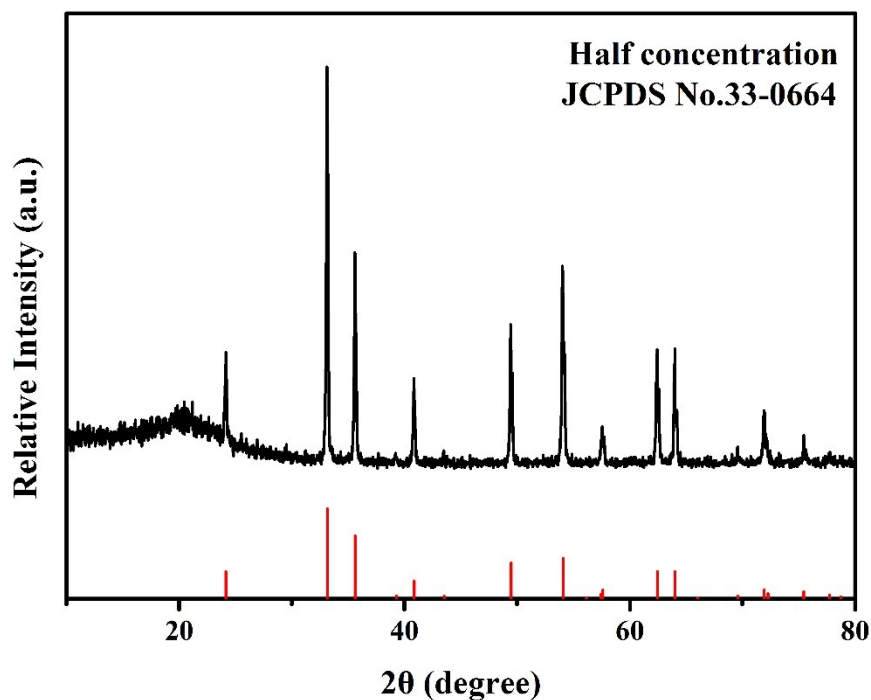

**Figure. S4** XRD pattern of the products synthesized under the condition in which urea and  $\text{FeCl}_3$  were in half concentration.

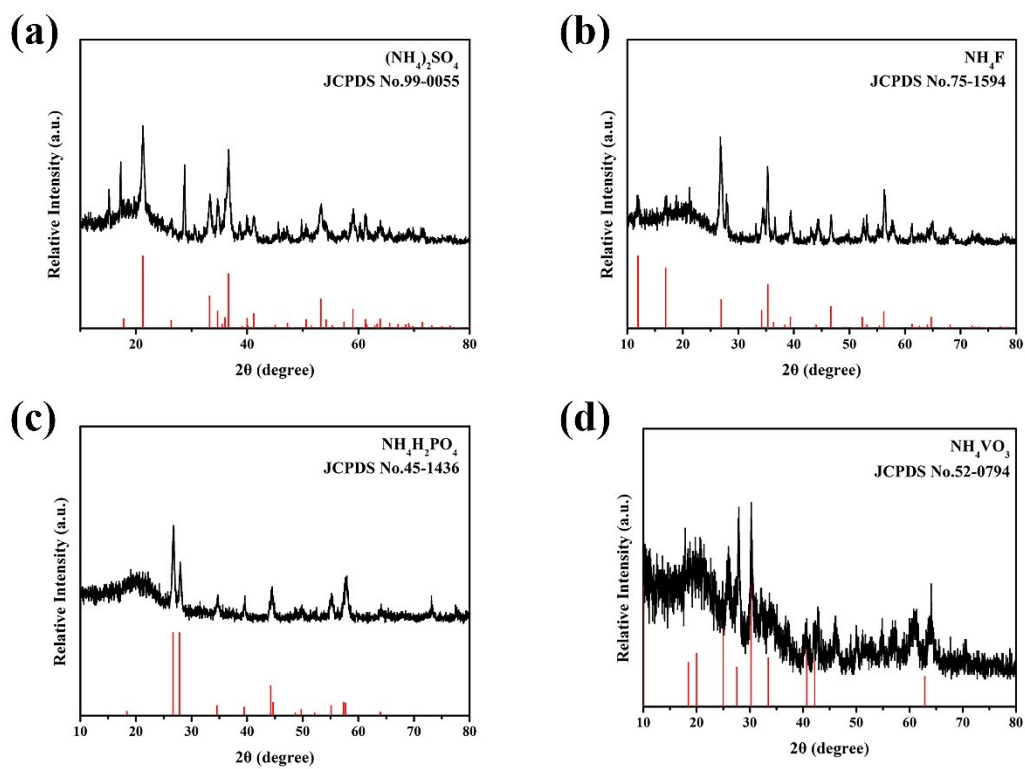

**Figure. S5** XRD patterns of the samples synthesized by (a)  $(\text{NH}_4)_2\text{SO}_4$ , (b)  $\text{NH}_4\text{F}$ , (c)  $\text{NH}_4\text{H}_2\text{PO}_4$ , (d)  $\text{NH}_4\text{VO}_3$ .

**Table. S1** Summary of the reaction products and morphology of the Fe<sub>2</sub>O<sub>3</sub> particles in different parameters.

| <i>Reactants</i>                                                | <i>Time (h)</i> | <i>Temperature (°C)</i> | <i>Product</i>                           | <i>Morphology</i>                                    |
|-----------------------------------------------------------------|-----------------|-------------------------|------------------------------------------|------------------------------------------------------|
| 2mmol FeCl <sub>3</sub> +2mmol urea                             | 24              | 120                     | β-FeOOH+α-Fe <sub>2</sub> O <sub>3</sub> | Nanorods+double hexagonal pyramid particles          |
|                                                                 | 24              | 140                     | α-Fe <sub>2</sub> O <sub>3</sub>         | Well-defined double hexagonal pyramid particles      |
|                                                                 | 24              | 170                     | α-Fe <sub>2</sub> O <sub>3</sub>         | Dull double hexagonal pyramid particles              |
|                                                                 | 1               | 140                     | β-FeOOH                                  | Nanorods                                             |
|                                                                 | 6               | 140                     | β-FeOOH+α-Fe <sub>2</sub> O <sub>3</sub> | Irregular particles+nanorods                         |
|                                                                 | 12              | 140                     | β-FeOOH+α-Fe <sub>2</sub> O <sub>3</sub> | Nanorods+double hexagonal pyramid particles          |
|                                                                 | 48              | 140                     | α-Fe <sub>2</sub> O <sub>3</sub>         | double hexagonal pyramid particles with dull edge    |
|                                                                 | 72              | 140                     | α-Fe <sub>2</sub> O <sub>3</sub>         | double hexagonal pyramid particles with many defects |
| 2mmol FeCl <sub>3</sub> +2mmol NH <sub>4</sub> Cl               |                 |                         |                                          | Amorphous particles                                  |
| 2mmol FeCl <sub>3</sub> +2mmol NH <sub>4</sub> HCO <sub>3</sub> | 24              | 140                     | α-Fe <sub>2</sub> O <sub>3</sub>         | Double hexagonal pyramid particles                   |
| 2mmol FeCl <sub>3</sub> +2mmol Na <sub>2</sub> CO <sub>3</sub>  |                 |                         |                                          | Rhombohedral particles                               |
| 1mmol FeCl <sub>3</sub> +1mmol urea                             |                 |                         |                                          | Double hexagonal pyramid particles with plenty holes |
