# Supplementary figures and images for: α-Fe2O3 with novel double hexagonal pyramid morphology synthesized using a dual-ion co-work system as an anode for lithium-ion batteries
Source: Royal Society of Chemistry journal article supplement (doi:10.1039/c9ce00618d), 2019-01-01

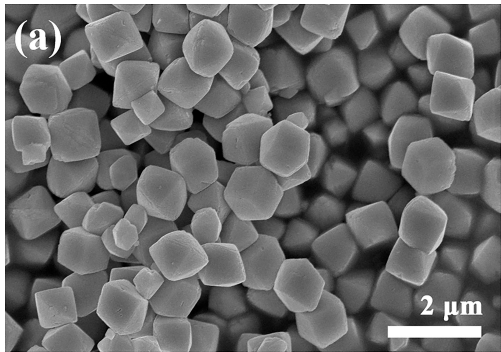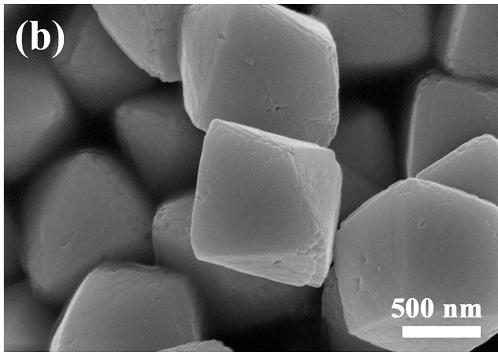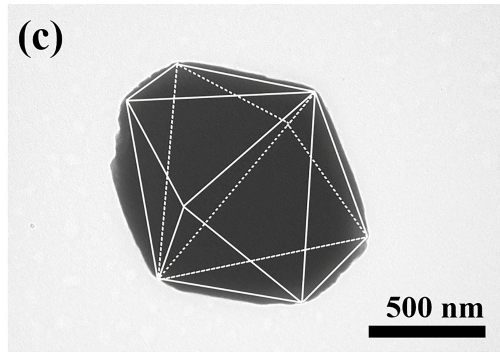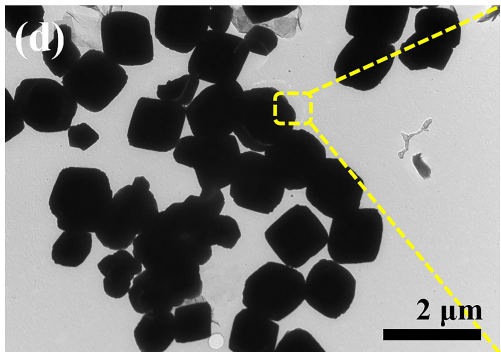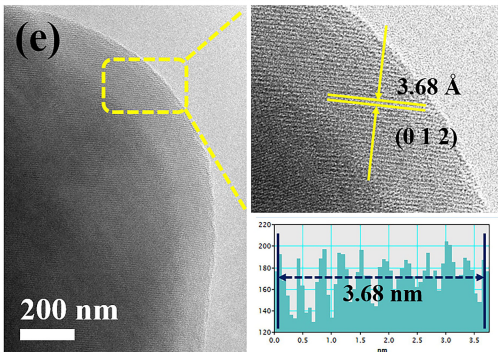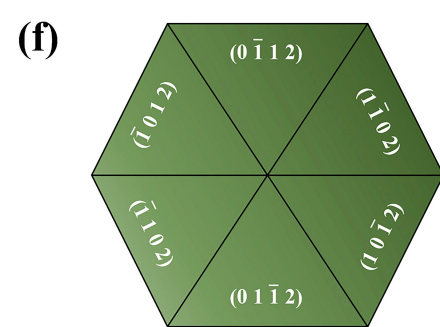

Supplement: c9ce00618d1.pdf [file c9ce00618d1.pdf]
